# Supplementary material
Source: Springer Nature journal article supplement (https://www.springermedizin.de/resource/supplementary/13054_2005_3525_MOESM1_ESM.pdf/9720678)

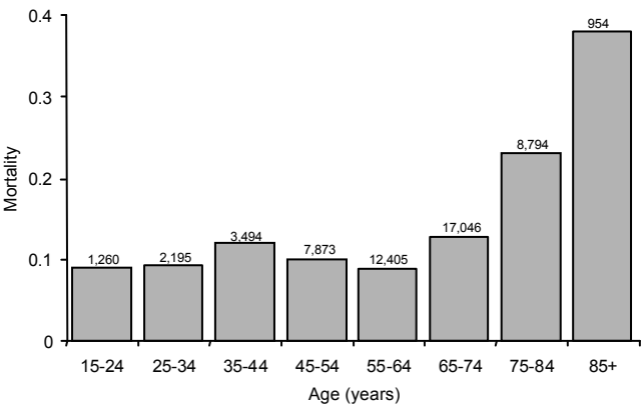

Supplement: MOESM1 [file 9720678]
